# Supplementary material
Source: PubMed Central journal article supplement (PMC3255090)
Supplement: NIHMS341197-supplement-1_si_001.pdf [file NIHMS341197-supplement-1_si_001.pdf]

Supplementary Information

Synthesis and Characterization of Amphiphilic Cyclic Diblock Copolypeptoids  
from *N*-Heterocyclic Carbene-Mediated Zwitterionic Polymerization of *N*-  
Substituted *N*-carboxyanhydride

Chang-Uk Lee,<sup>a</sup> Thomas P. Smart,<sup>b</sup> Li Guo,<sup>a</sup> Thomas H. Epps, III<sup>b</sup> and Donghui Zhang<sup>a,\*</sup>

<sup>a</sup>*Department of Chemistry and Macromolecular Studies Group, Louisiana State University, Baton Rouge, LA 70803*

<sup>b</sup>*Department of Chemical Engineering, University of Delaware, Newark, DE 19716*

\*corresponding to: [dhzhang@lsu.edu](mailto:dhzhang@lsu.edu)

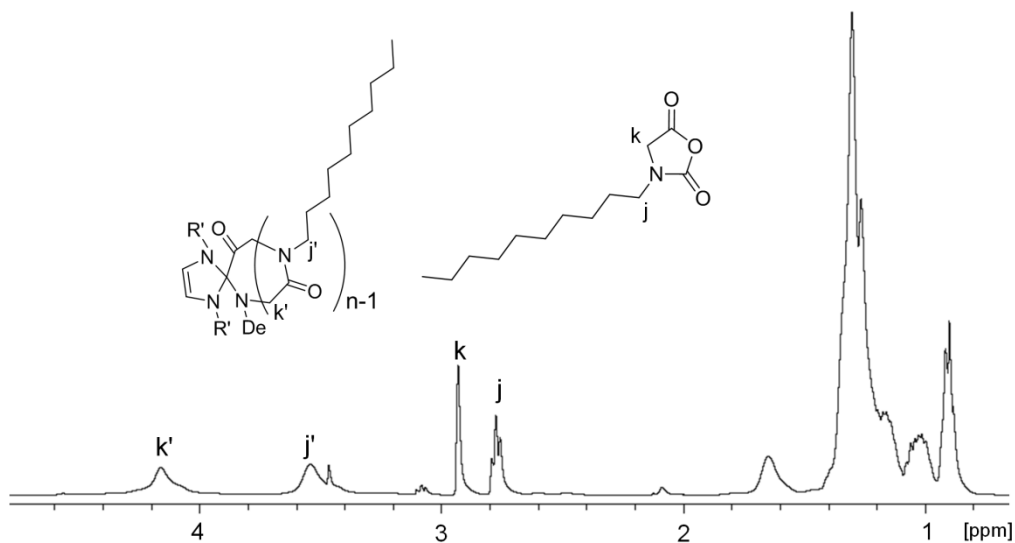

**Figure S1.** Representative  $^1\text{H}$  NMR spectrum of a NHC-mediated polymerization of  $\text{M}_1$  at  $70\text{ }^\circ\text{C}$  in toluene- $\text{d}_8$  showing the formation of cyclic poly(*N*-decyl-glycine) (*c*-PNDG) and unreacted  $\text{M}_1$  ( $[\text{M}_1]_0:[\text{NHC}]_0 = 50:1$ ,  $[\text{M}_1]_0 = 0.4\text{ M}$ , reaction time = 62 m).

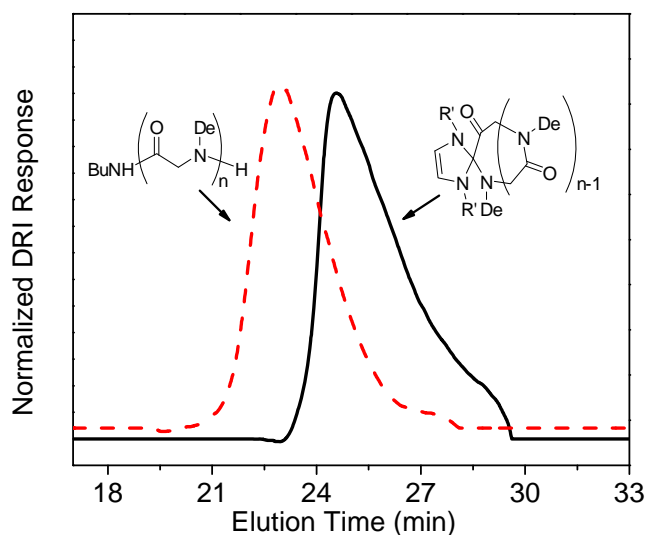

**Figure S2.** SEC chromatograms of a high MW *c*-PNDG sample ( $M_n = 20.4\text{ kg}\cdot\text{mol}^{-1}$ , PDI = 1.20) (—) and its linear analog (*l*-PNDG) ( $M_n = 20.8\text{ kg}\cdot\text{mol}^{-1}$ , PDI = 1.09) (---) that were independently prepared from the NHC-mediated and  $\text{BuNH}_2$ -initiated polymerization of  $\text{M}_2$ , respectively.

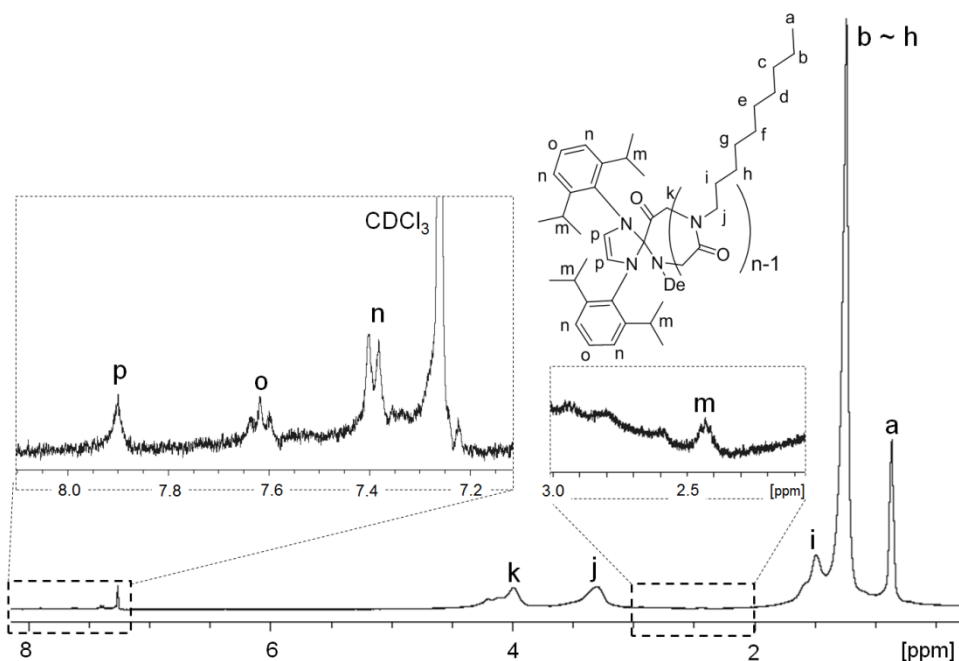

**Figure S3.**  $^1\text{H}$  NMR spectrum of a low MW *c*-PNDG in  $\text{CDCl}_3/\text{CF}_3\text{COOD}$  where proton resonances of the NHC are notably visible.

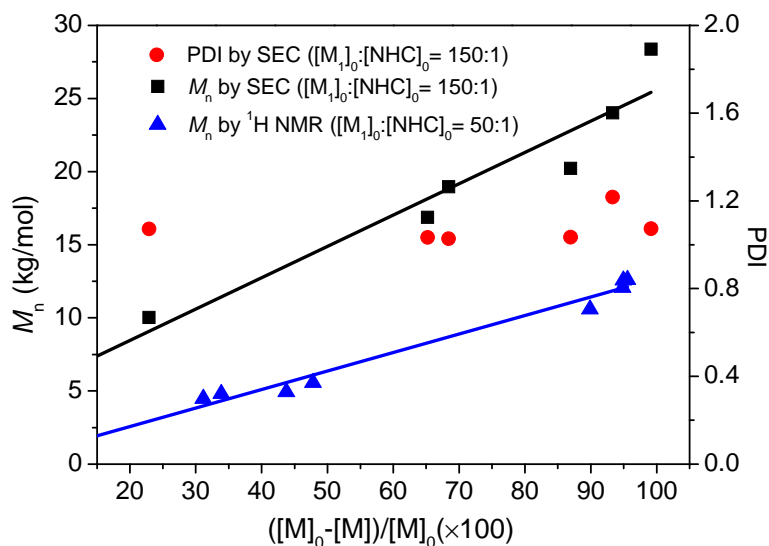

**Figure S4.** The plot of polymer molecular weights  $[M_n]$ : ■ determined by SEC-MALS-DRI or ▲  $^1\text{H}$  NMR analysis and PDI (●) of *c*-PNDGs versus conversion for the NHC-mediated polymerization of  $M_2$  in THF at  $70^\circ\text{C}$  ( $[M_2]_0:[I]_0 = 150:1$  or  $50:1$ ,  $[M_2]_0 = 0.4\text{ M}$ ). [Note: aliquots of the polymerization solution ( $[M_2]_0:[I]_0 = 150:1$ ) was taken, filtered and directly injected into SEC columns for the MW determination over the course of reaction].

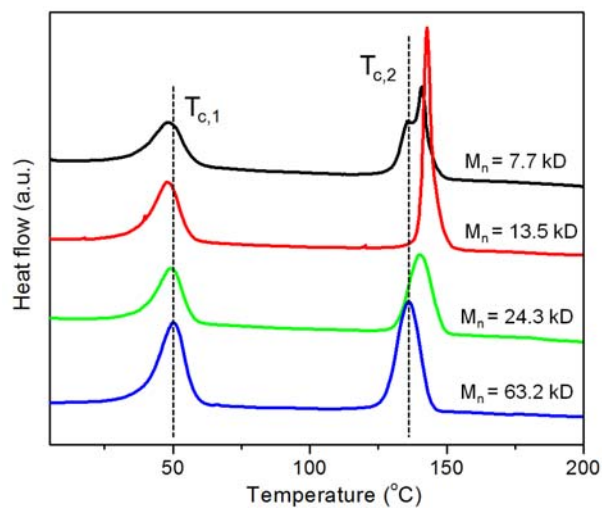

**Figure S5.** DSC thermograms of *c*-PNDGs having different molecular weights collected from the first cooling cycle.

**Table S1.** Crystallization temperature and heat of fusion of *c*-PNDGs of various MWs.

| $M_n$ (kg·mol <sup>-1</sup> ) | $T_{c,1}$ (°C) | $T_{c,2}$ (°C) | $\Delta H_{c,1}$ (J·g <sup>-1</sup> ) | $\Delta H_{c,2}$ (J·g <sup>-1</sup> ) |
|-------------------------------|----------------|----------------|---------------------------------------|---------------------------------------|
| 7.7                           | 48.8           | 140.8          | 37.3                                  | 44.6                                  |
| 13.5                          | 47.7           | 145.6          | 40.5                                  | 50.8                                  |
| 24.3                          | 49.5           | 139.7          | 36.7                                  | 42.8                                  |
| 63.2                          | 49.8           | 135.8          | 37.4                                  | 39.8                                  |

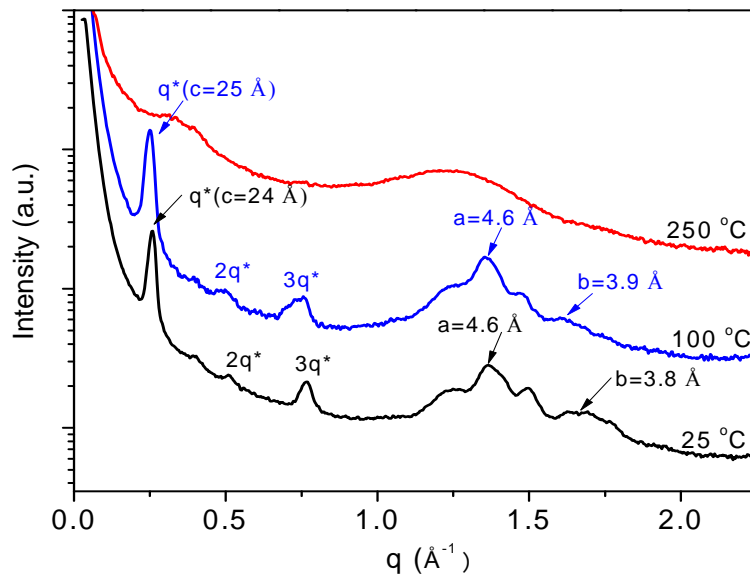

**Figure S6.** WAXS diffractograms of as-prepared *c*-PNDG ( $M_n = 7.7 \text{ kg}\cdot\text{mol}^{-1}$ , PDI=1.26) without thermal annealing in the solid state at 25, 100 and 250 °C.

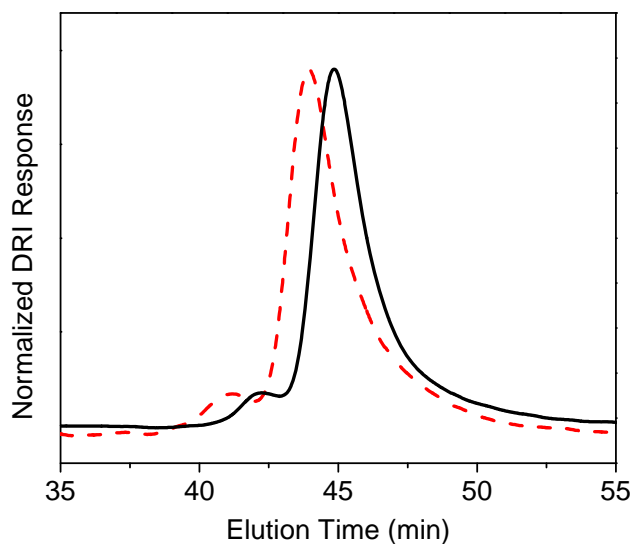

**Figure S7.** SEC-DRI chromatograms of cyclic poly(*N*-methyl-glycine)<sub>105</sub> (—) and cyclic poly(*N*-methyl-glycine)<sub>105</sub>-*b*-poly(*N*-decyl-glycine)<sub>15</sub> diblock copolymers (---) prepared from sequential NHC-mediated polymerization of  $M_2$  and  $M_1$ .

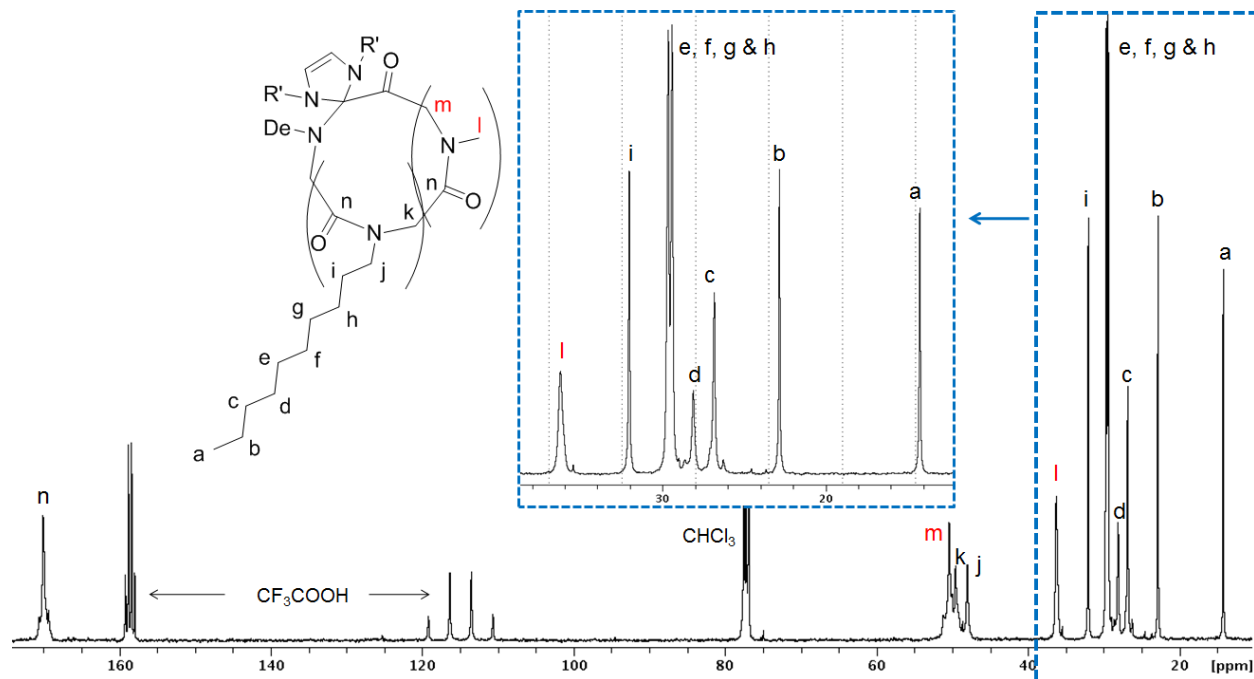

**Figure S8.**  $^{13}\text{C}\{^1\text{H}\}$  NMR spectra of cyclic poly(*N*-Me-glycine)<sub>105</sub>-*b*-poly(*N*-De-glycine)<sub>50</sub> (*c*-PNMG<sub>105</sub>-*b*-PNDG<sub>50</sub>) in CDCl<sub>3</sub>/CF<sub>3</sub>COOD.

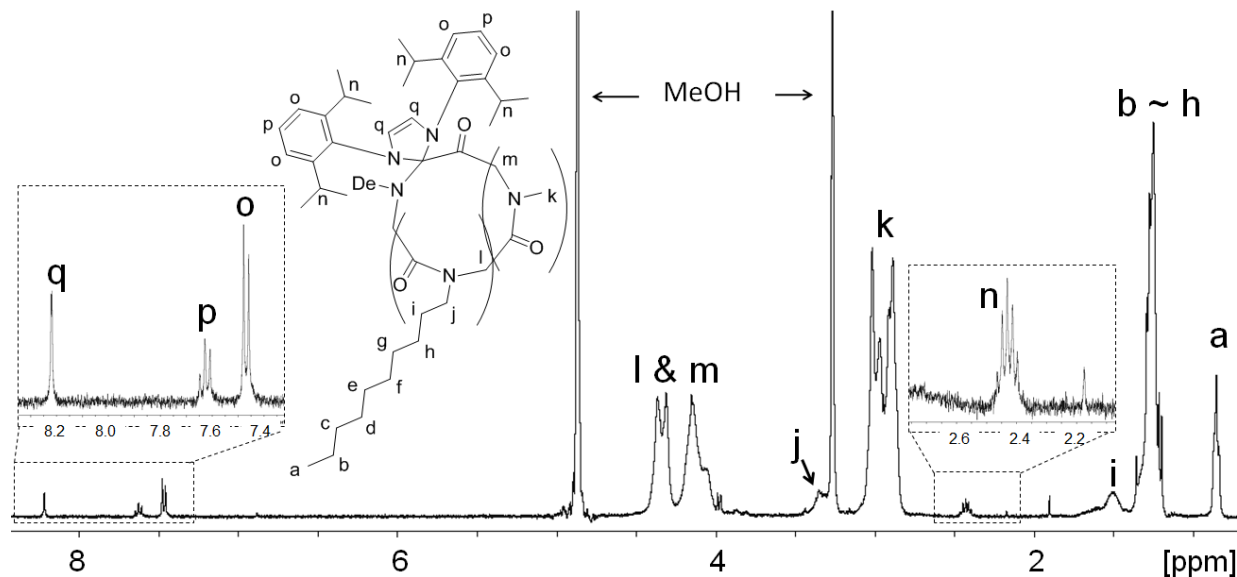

**Figure S9.**  $^1\text{H}$  NMR spectrum of a low MW cyclic poly(*N*-Me-glycine)-*b*-poly(*N*-De-glycine) diblock copolymer (*c*-PNMG<sub>72</sub>-*b*-PNDG<sub>8</sub>) in CD<sub>3</sub>OD, where proton resonances of the NHC are notably visible.

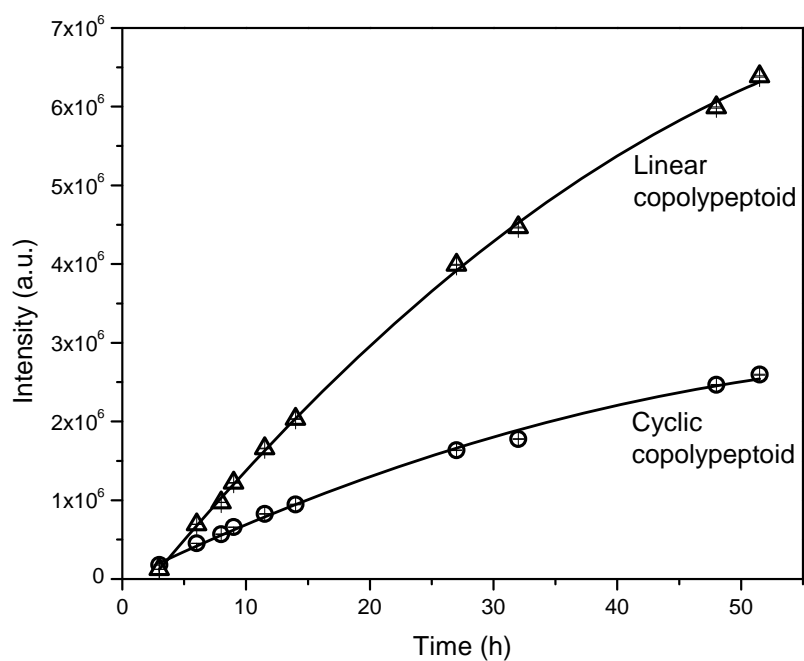

**Figure S10.** Turbidity measurements of both linear and cyclic block copolypeptoid solutions in methanol over the first 2 d after preparation.

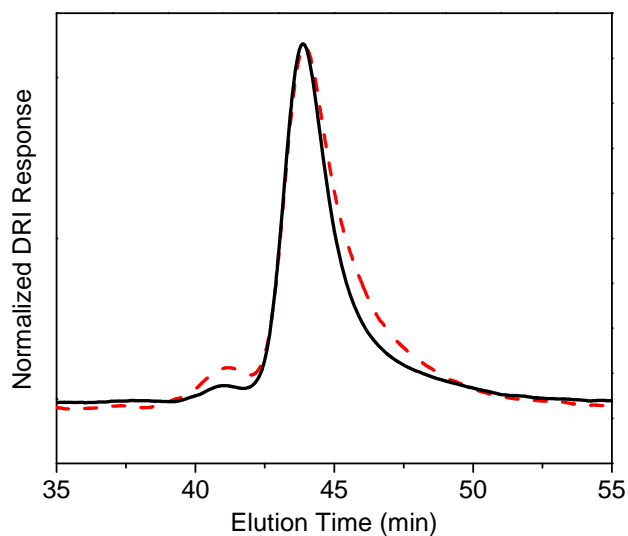

**Figure S11.** SEC-DRI chromatograms of cyclic poly(*N*-methyl-glycine)<sub>105</sub>-*b*-poly(*N*-decyl-glycine)<sub>15</sub> obtained after 17 d in room temperature methanol (---) and the original sample (—).

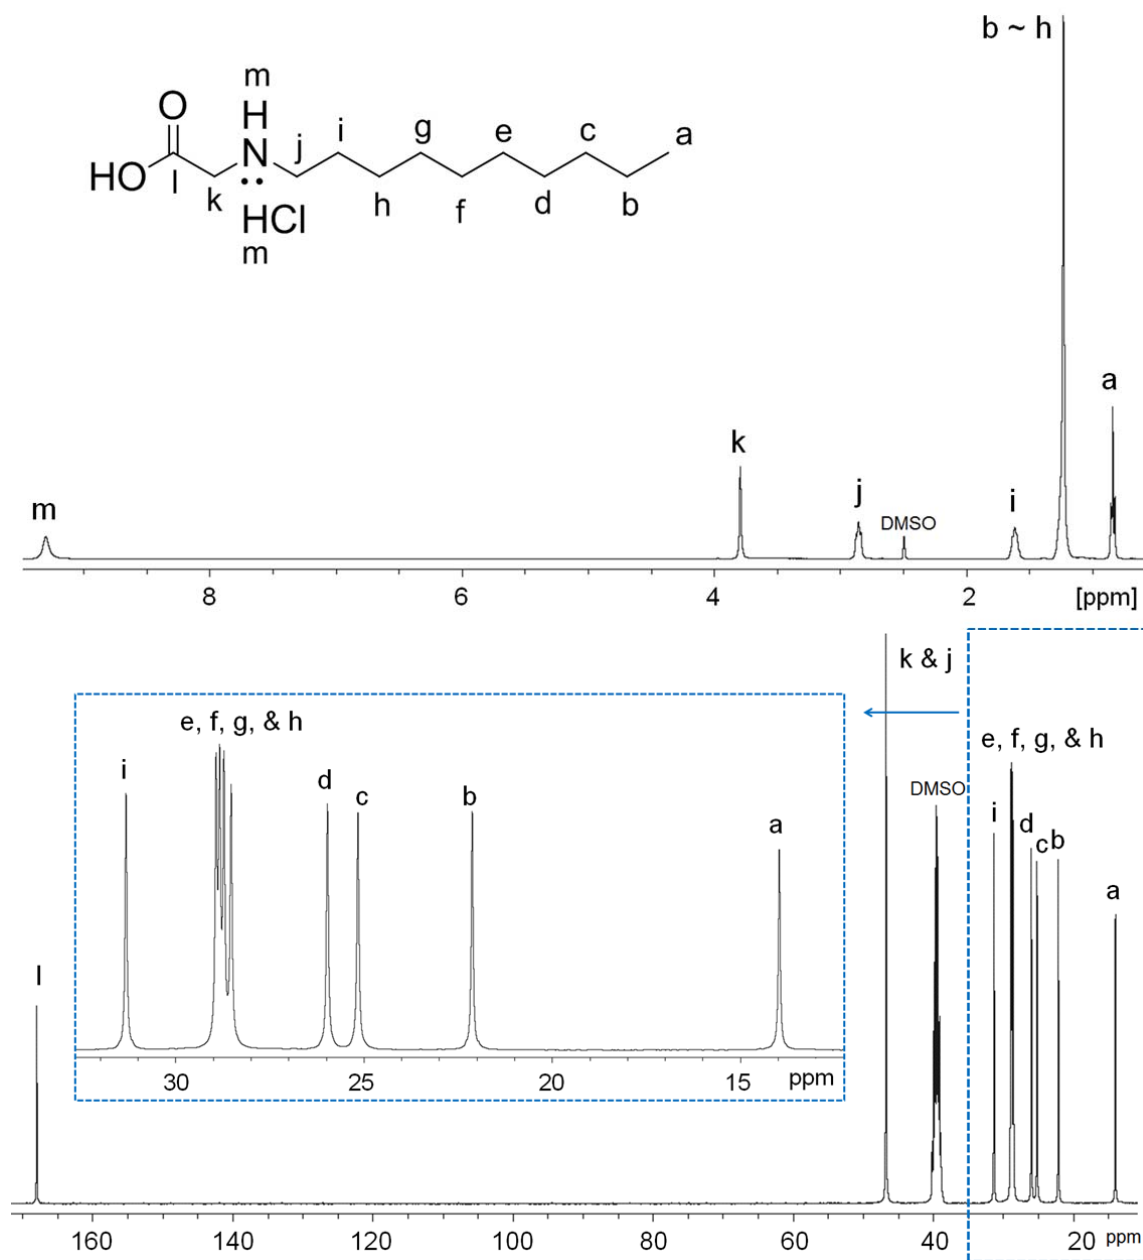

**Figure S12.**  $^1\text{H}$  and  $^{13}\text{C}\{^1\text{H}\}$  NMR spectra of 2-(*n*-decylamino)acetic acid hydrochloride (**1**) in  $\text{DMSO-d}_6$ .



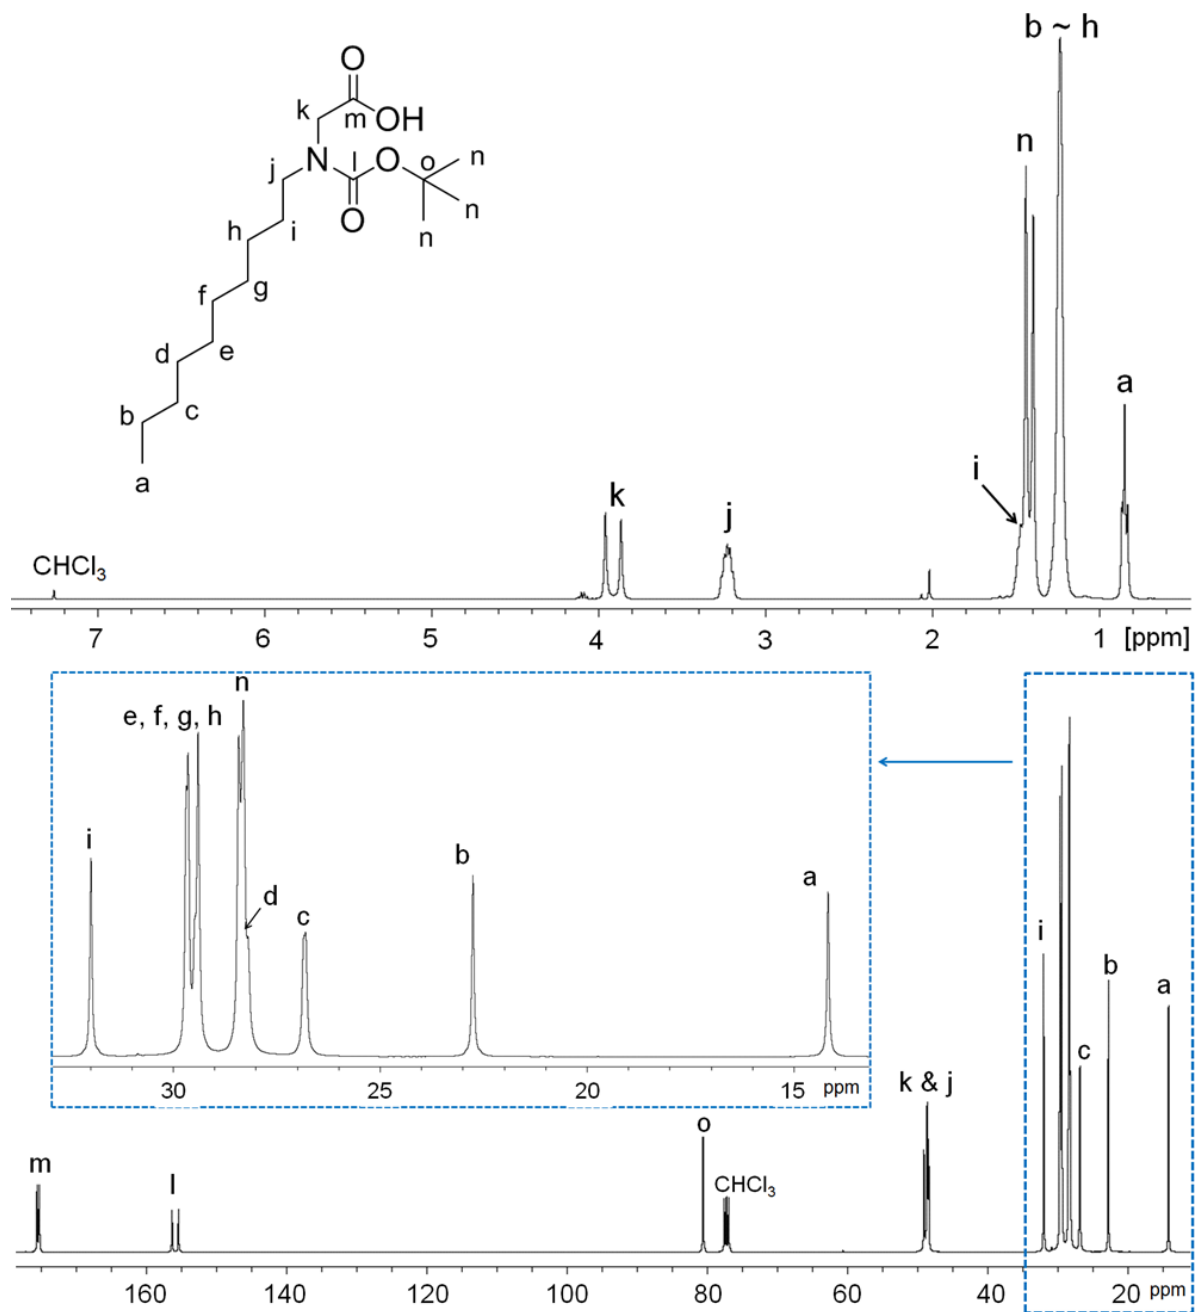

**Figure S13.**  $^1\text{H}$  and  $^{13}\text{C}\{^1\text{H}\}$  NMR spectra of 2-(*N,N*-*tert*-butoxycarbonyl-*n*-decylamino)acetic acid (**2**) in  $\text{CDCl}_3$ .
